# Supplementary material
Source: PubMed Central journal article supplement (PMC7964814)
Supplement: 2770_table.pdf [file 2770_table.pdf]

**On-Line Table 1: Characteristics, symptoms, initial cerebral MR findings, and their time course**

| Age (yr)/<br>Sex | Symptoms                      | Treatment<br>for IVL | MRI Findings Pretreatment/Changes in Findings on FU MRI Studies <sup>a</sup> |                                                       |                          |                                        |                                                 | Brain Postmortem         |
|------------------|-------------------------------|----------------------|------------------------------------------------------------------------------|-------------------------------------------------------|--------------------------|----------------------------------------|-------------------------------------------------|--------------------------|
|                  |                               |                      | Infarctlike Lesions                                                          | Nonspecific WM<br>lesions                             | Meningeal<br>Enhancement | Mass Lesions                           | Hyperintense Lesions in<br>Central Pons on T2WI |                          |
| 1) 74/M          | Fever, dementia               | Yes                  | X (watershed/corpus<br>callosum)/shrunk<br>(day 50)                          |                                                       |                          |                                        |                                                 | Yes                      |
| 2) 69/M          | Fever, shortness<br>of breath | Yes                  | X (watershed/periventricular area/<br>shrunk<br>(yrs 21–49)                  | X (periventricular<br>area)/decreased<br>(days 21–49) | X/vanished<br>(day 21)   |                                        |                                                 | Yes                      |
| 3) 84/F          | Fever, personality<br>change  | No                   |                                                                              | X (periventricular/<br>subcortical area/<br>extended) |                          |                                        |                                                 | Yes                      |
| 4) 70/M          | Fever, dementia               |                      |                                                                              |                                                       |                          | X (multiple)/improved<br>(days 28–131) |                                                 | No                       |
| 5) 69/F          | Fever                         | No                   |                                                                              |                                                       |                          |                                        | X/extended                                      | Yes (only frontal lobes) |
| 6) 67/F          | Fever, dementia               | Yes                  |                                                                              |                                                       |                          |                                        | X/decreased (day 94)                            | No                       |
| 7) 73/F          | Fever, dementia               | Yes                  |                                                                              |                                                       |                          |                                        | X/decreased (day 124)                           | No                       |
| 8) 63/F          | Fever, dementia               | Yes                  |                                                                              |                                                       |                          |                                        | X/decreased (day 85)                            | No                       |
| 9) 76/F          | Fever, malaise                | Yes                  |                                                                              |                                                       |                          |                                        | X/decreased (day 3)                             | No                       |
| 10) 73/M         | Fever, personality<br>change  | Yes                  | No abnormal finding                                                          |                                                       |                          |                                        | Yes                                             | No                       |
| 11) 67/F         | Fever, shortness<br>of breath | Yes                  | No abnormal finding                                                          |                                                       |                          |                                        | No                                              | No                       |

**Note:**—FU indicates follow-up; X, presence of finding.

<sup>a</sup> Day 0 is the day treatment started.
